RESEARCH ARTICLE

# Genetic polymorphism of Merozoite Surface Protein-2 (MSP-2) in *Plasmodium falciparum* isolates from Pawe District, North West Ethiopia

Hussein Mohammed\*, Moges Kassa, Ashenafi Assefa, Mekonnen Tadesse, Amha Kebede

Bacterial, Parasitic and Zoonotic Diseases Research Directorate, Ethiopian Public Health Institute, Addis Ababa, Ethiopia

\* [hussein\\_ehnri@yahoo.com](mailto:hussein_ehnri@yahoo.com)

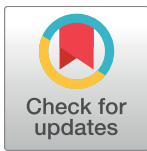

## Abstract

### Background

In malaria endemic regions, *Plasmodium falciparum* infection is characterized by extensive genetic diversity. Describing this diversity provides important information about the local malaria situation. This study was conducted to evaluate the extent of genetic diversity of *P. falciparum* in Pawe district, North West Ethiopia, using the highly polymorphic merozoite surface protein 2 gene.

### Methods

A total of 92 isolates from patients with uncomplicated *P. falciparum* attending Pawe Health Centre were collected from September to December 2013. Genomic DNA was extracted using the Chelex method and analyzed by length polymorphism following gel electrophoresis of DNA products from nested PCR of *msp2* (block 3), targeting allelic families of FC27 and 3D7/IC.

### Results

There were twenty-two different *msp2* alleles, 11 corresponding to the 3D7/IC and 11 to the FC27 allelic family. The frequency of isolates of the *msp2* 3D7/IC allelic family was higher (51%) compared to FC27 (49%). The majority of the isolates (76%) contained multiple infections and the overall mean multiplicity of infection was 2.8 (CI 95% 2.55–3.03). The heterozygosity index was 0.66 for *msp2*. There was no statically significant difference in the multiplicity of infection by age or parasite density.

### Conclusions

The results of this study show that *P. falciparum* polymorphisms are extensive in Northwest Ethiopia and most of the infections are composed of multiple clones.

## OPEN ACCESS

**Citation:** Mohammed H, Kassa M, Assefa A, Tadesse M, Kebede A (2017) Genetic polymorphism of Merozoite Surface Protein-2 (MSP-2) in *Plasmodium falciparum* isolates from Pawe District, North West Ethiopia. PLoS ONE 12 (5): e0177559. <https://doi.org/10.1371/journal.pone.0177559>

**Editor:** Luzia Helena Carvalho, Centro de Pesquisas Rene Rachou, BRAZIL

**Received:** July 8, 2016

**Accepted:** April 28, 2017

**Published:** May 19, 2017

**Copyright:** © 2017 Mohammed et al. This is an open access article distributed under the terms of the [Creative Commons Attribution License](https://creativecommons.org/licenses/by/4.0/), which permits unrestricted use, distribution, and reproduction in any medium, provided the original author and source are credited.

**Data Availability Statement:** All relevant data are within the paper and its supporting information files.

**Funding:** The study was funded by Federal Ministry of Health Ethiopia (FMOH), the International Atomic Energy Agency (IAEA) and Ethiopian Public Health (EPHI). The funders had no role in the study design, data collection and analysis, or collection and analysis, or decision to publication, and preparation of the manuscript.

**Competing interests:** The authors have declared that no competing interests exist.

**Abbreviations:** BP, base pairs; EPHI, Ethiopian public health institute; He, heterozygosity; IAEA, International atomic energy agency; MOI, multiplicity of infections; *m*sp2, merozoite surface protein 2 gene; PCR, polymerase chain reaction; WHO, world health organization.

## Introduction

Despite declining trends, malaria remains an important global public health problem. According to the World Malaria Report 2015, there were about 214 million cases of malaria and an estimated 438,000 deaths. Of these, mostly (90%) occurred in sub-Saharan Africa [1]. Malaria is a major public health problem despite of relatively low malaria prevalence compared to other malaria endemic African countries. As a result, malaria reported confirmed cases were about 1,867,059 (84.1 percent) and an estimated 662 deaths; out of which, 64% were *Plasmodium falciparum* and 36% were *Plasmodium vivax* [2]. However, approximately 60% of the population lives in areas at risk of malaria [3]. Among malaria parasite species, *Plasmodium falciparum* (*P. falciparum*) is the most virulent and associated with the most malaria-related deaths [4]. Screening of the diversity of malaria parasite populations is important in monitoring the deployment of malaria control and elimination strategies. Patients infected with multiple parasite clones commonly reside in high transmission intensity areas, which impacts upon the host immune status [5]. In addition, while the development of an effective malaria vaccine would be an important additional tool towards malaria control and elimination, antigenic diversity is a major challenge in its development [6].

The merozoite surface protein (MSP-1) and (MSP-2) are of *P. falciparum* are associated with an immune response and have been identified as potential targets for a blood-stage malaria vaccine [7]. MSP2 is a glycoprotein expressed on the surface of merozoites that has been considered as a candidate malaria vaccine [8]. The *m*sp2 gene has two major allelic families, FC27 and 3D7/IC based on variation in length and sequence in the central region [9]. The *m*sp2 block 3 is the most polymorphic and could serve alone in describing the diversity of parasite populations. *P. falciparum* parasite populations are often characterized by extensive genetic diversity in areas with high transmission intensity [10]. Therefore, investigating the diversity of *P. falciparum* and multiplicity of infection (MOI) may be useful to describe the level of malaria transmission [11,12] and to assess the effect of control interventions in the study area.

The genetic diversity of *P. falciparum* has been extensively studied in various parts of the world [13–15], but limited data are available from Ethiopia. The only study conducted by Mohammed *et al.* demonstrated moderate to high genetic polymorphism of *P. falciparum* populations in southwest Ethiopia which revealed moderate transmission in the area [16]. Since then, no other study has reported the genetic diversity of *P. falciparum* in the country. Since that time, malaria prevention and intervention programs have been scaled up [17]. Hence, it is important to reassess the malaria situation by detecting the existing parasite population dynamics, through assessment of parasite genetic diversity, in order to better inform control measures. This study aims to assess the extent of genetic diversity in *P. falciparum* isolates from Pawe northwest, Ethiopia.

## Materials and methods

### Study site

The study sample was conducted in the rural town of Pawe, Benishangul-Gumuz Regional state in the northwest of Ethiopia (Fig 1). The study area is located 556 km away from Addis Ababa with a catchment population estimated at 45,000 inhabitants. The area is located at an altitude of 1050 meters above sea level with a mean annual temperature ranging from 16.2°C to 32.2°C, and a mean annual rainfall between 980 and 1200 mm occurring in two seasons from March to May and from June to December. Water for mosquito breeding is available from three sources; the Belese river, Ali-spring and Diga dam. Malaria is present throughout the year, with a peak during the rainy season. In this region, *P. falciparum* is the dominant malaria species.

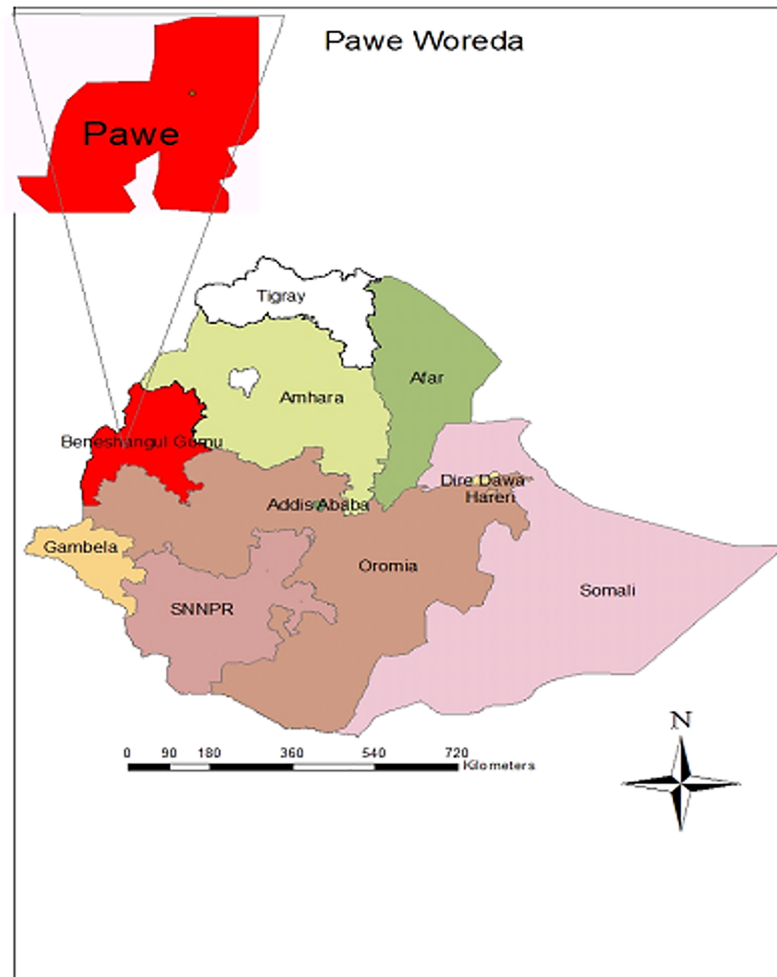

**Fig 1. Map of the sample collection area, Pawe district North West Ethiopia.**

<https://doi.org/10.1371/journal.pone.0177559.g001>

### Study population and blood sample collection

A total of 92 *P. falciparum* infected blood spot samples were collected during a therapeutic efficacy study of arthemeter-lumefantrine (Coartem<sup>®</sup>) from September to December, 2013. The samples used in this study were from patients aged three to 60 years, presenting to the local Health Center. Inclusion criteria: all patients consented, were febrile, axillary temperatures  $\geq 37.5^{\circ}\text{C}$  and positive for asexual *P. falciparum* and were residents within the catchment area. The blood was spotted onto 903<sup>®</sup> filter paper (Schleicher & Schuell BioScience), air-dried and individually placed into plastic bags with desiccant, before being transported to the Malaria Research Laboratory (Ethiopian Public Health Institute) at Addis Ababa and kept at  $-20^{\circ}\text{C}$  prior to molecular analysis.

### Laboratory procedures

**Parasite DNA extraction.** Genomic DNA was extracted from dried blood spots using the Chelex-100<sup>®</sup> (Bio-Rad Laboratories CA) method [18], with a final volume of 200  $\mu\text{l}$  for each sample and storage at  $-20^{\circ}\text{C}$  until allelic typing.

**Allelic typing of *P. falciparum*msp2 gene.** The polymorphic region from the *P. falciparum*msp2 gene block 3 was used as a genetic marker for the genotyping of parasite populations. Genotyping the *msp2* gene was undertaken in a two-step reaction, primary amplification of the entire polymorphic gene segments of block 3, followed by a nested reaction targeting the allelic type-specific regions within this block [19]. All reactions were carried out in a final volume of 20  $\mu$ l containing 125mM dNTP, 250 nM of each primer, 2mM MgCl<sub>2</sub>, and 0.02 units per  $\mu$ l of Taq polymerase (Roche Applied Science, Germany) and PCR buffer (950mM KCl, 20mMTris-HCl, pH 8.8). In the first round reaction, 4 $\mu$ l of genomic DNA was added as a template. In the nested reaction, 2 $\mu$ l of the first PCR product was added. Each amplification profile consisted of initial denaturation at 94°C for 3 min, followed immediately by 30 cycles at 94°C for 1 min; 50°C for 35 seconds, and 68°C for 2.5 minutes. The final cycle was prolonged extension at 72°C for 3 min. PCR reaction mixtures were incubated in a thermal cycler (MyCycler-BioRad, Hercules, USA). Allelic specific positive control 3D7 and DNA-free negative controls were included in each set of reactions. The nested PCR products separated on 2% ethidium bromide-stained agarose gels were visualized under ultraviolet (UV) trans-illumination and photographed. The fragment size was estimated in relation to a 50 bp DNA ladder (Boehringer Mannheim Marker VI). Presence of more than one genotype was considered to be a polyclonal infection, while the presence of a single allele was considered as a monoclonal infection. Alleles in each family were considered the same if fragment sizes were within a 20 bp interval [20]. Heterozygosity index (He), was calculated by using the following formula:  $He = [n / (n-1)] [(1 - \sum p_i^2)]$ , where n is the number of isolates sampled and p<sub>i</sub> is the allele frequency at a given locus [21].

## Ethics consideration

The study was ethically approved by the Scientific and Ethical Review Office (SERO) of the Ethiopian Public Health Institute (EPHI). Written informed consent was obtained from the parents or guardian prior to recruitment.

## Data analysis

Data were analyzed using SPSS version 16 (SPSS Inc., Chicago, IL, USA). The *msp2* allelic frequency was calculated as the proportion of the allelic family out of the alleles detected in the isolates. The multiplicity of infection (MOI) was estimated by the average number of PCR fragments per infected individual. Proportion was compared for significance using the Chi-square test. Spearman's rank correlation coefficient was calculated to assess the possible associations between MOI and geometric mean parasite density and age. *P* value of  $\leq 0.05$  was considered indicative of statistical significance.

## Results

### Demographic and parasitological data

Of the total 92 samples, 54 (58.7%) were from males and 38 (41.3%) were from females. The patients' ages ranged from three years to 60 years (mean age:  $15.78 \pm 1.062$  years). The asexual parasitaemia for *P. falciparum* collected samples ranged between 237 parasites to 380,270 parasites/ $\mu$ l of blood with a geometric mean of 20,491 (95% CI: 15,121–28,354) parasites per  $\mu$ l as shown in Table 1. Children less than 10 years of age had the highest mean parasite density (70,617 parasites /  $\mu$ l  $\pm 15,419$ ) compared to other age groups (Fig 2). The mean parasite density in adults greater than 20 years was 46,229 parasites /  $\mu$ l ( $\pm 17,676$ ) (Table 2).

**Table 1. Demographic and parasitological data of the study individuals at Pawe district, North West Ethiopia, 2016.**

| Characterization of patients              | Values                         |
|-------------------------------------------|--------------------------------|
| Mean age (year)                           | 15.78 ± 1.062*                 |
| Sex ratio (Male/Female)                   | 1.4 (54/38)                    |
| Geometric mean of parasite density (p/μl) | 20,491 (95% CI: 15,121–28,354) |
| Parasite density range (p/μl)             | 237–380,270                    |

p/μl: parasite per microliter,

\*:Standard deviation.

<https://doi.org/10.1371/journal.pone.0177559.t001>

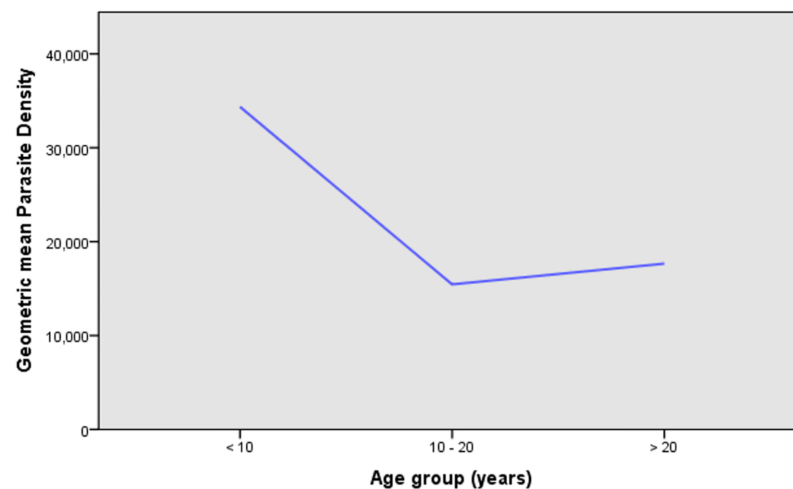

**Fig 2. Relationship between geometric mean parasite density and age group (n = 92).**

<https://doi.org/10.1371/journal.pone.0177559.g002>

### Allelic diversity of *Plasmodium falciparum*msp2 gene

Alleles were determined by size and family type. A total of 22 different alleles were detected, of which 11 alleles belonged to FC27 type (300–700 bp) and 11 alleles belonged to 3D7/IC type (250–650 bp) (Figs 3 and 4). The proportion of isolates having only 3D7/IC and FC27 alleles was 12 (13%) and 10 (11%) respectively. Sixty-eight (74%) of the isolates carried both allelic families. Two per cent (2%) of the isolates were not identified to any of the 3D7/IC or FC27 allelic family despite being repeatedly amplified. Seventy-six percent (70/92) of the isolates contained multiple *msp2* alleles and the overall mean multiplicity of infection was 2.8 (CI 95% 2.55–3.03). No statistical difference was observed between multiplicity of infection according to age or parasite density (P = 0.411) as shown in Figs 2 and 5. Expected heterozygosity was 0.66 for the *msp2*

**Table 2. Mean of *Plasmodium falciparum* density (parasite/ul) and multiplicity of infection in *msp2* gene stratified by age group (N = 92).**

| Age (years) | N  | Parasite density | MOI  |
|-------------|----|------------------|------|
| <10         | 29 | 70,617           | 2.62 |
| 10–20       | 42 | 40,611           | 3.02 |
| >10         | 21 | 46,229           | 2.62 |

N: number of malaria cases, MOI: multiplicity of infection

<https://doi.org/10.1371/journal.pone.0177559.t002>

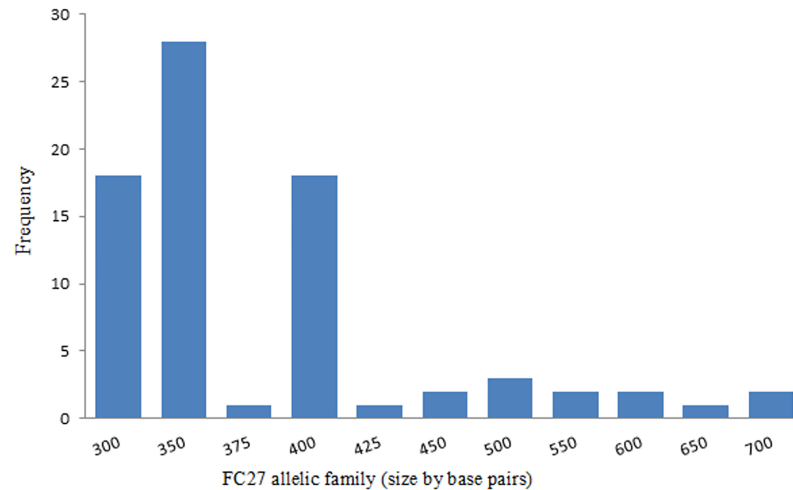

**Fig 3. Distribution of FC27 alleles of *P. falciparum* msp2 gene in isolates in northwest Ethiopia.**

<https://doi.org/10.1371/journal.pone.0177559.g003>

locus. Ninety isolates that successfully identified for the presence of MSP2 allelic families (FC27 and 3D7/IC) were classified according to the size of their amplified fragment (S1 and S2 Figs).

## Discussion

Compared to other countries, limited studies have been carried in Ethiopia exploring the genetic diversity of *P. falciparum*. To our knowledge this is the second such study, after our previous report from southwest Ethiopia [16]. This study determined the genetic polymorphism of *P. falciparum* in the Pawe area, using the most polymorphic region of the *msp2* gene. A high genetic diversity of the population of *P. falciparum* isolates from the study area was found. These findings may also be an important indicator to inform the effect of control interventions in the country.

The allele specific *P. falciparum* *msp2* genotyping showed that the malaria parasite population in the Pawe area is highly diverse. However, fragments with interval lengths of less than 20 base pairs could not clearly be distinguished as separate alleles. Among the isolates of *msp2*

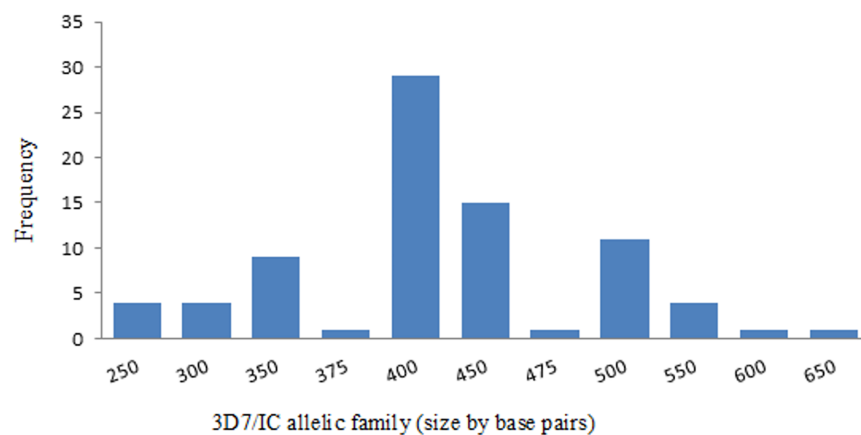

**Fig 4. Distribution of 3D7/IC alleles of *P. falciparum* msp2 gene isolates in northwest Ethiopia.**

<https://doi.org/10.1371/journal.pone.0177559.g004>

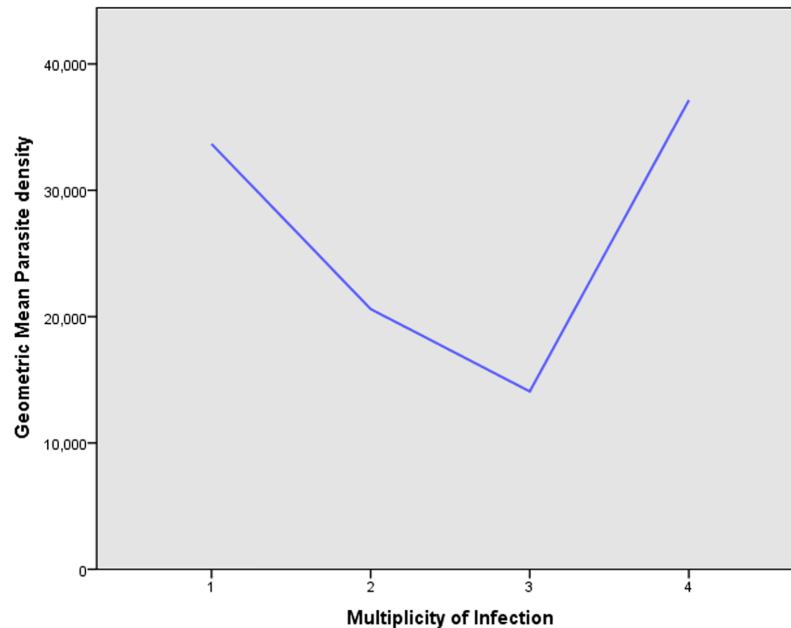

**Fig 5. Relationship between geometric mean parasite density and multiplicity of *P. falciparum* infection (n = 92).**

<https://doi.org/10.1371/journal.pone.0177559.g005>

diversity, a predominance of 3D7/IC allelic family was found in study area. This has also consistent with reports from Congo Brazzaville [20], sub-Saharan Africa [13] and Cameroon [22], but differs from genotyping in Benin [23] and Sudan [24]. This suggests that the diversity of *P. falciparum* infections may differ according to geographical location, transmission intensity and sample population.

The heterozygosity in the present study was relatively high ( $H_e = 0.66$ ), suggesting a large genotype diversity within the *msp2* locus, which is higher than previously reported in Ethiopia and Malaysia [16,25]. In contrast, declining rates of diversity of alleles (heterozygosity) in *P. falciparum* are associated with decreasing transmission rates [26,27]. The current study area has high genetic diversity in parasite populations with high local transmission and thus it requires increased attention with malaria control programs.

Furthermore, the present study demonstrated that three quarters of the isolates (76%) harbored multiple genotypes. This suggests a relatively high diversity of the *P. falciparum* parasite population in this localized area. This finding is similar to reports from the Republic of Congo [20] and Burkina Faso [28]. This finding is consistent with an association between malaria transmission levels and the frequency of multiple infections, with individuals living in high malaria transmission areas generally harboring multiple parasite strains.

Apparent multiplicity of infection (MOI) is often used as proxy for transmission and higher MOI reported in some areas may be related to the transmission intensity [29]. The MOI reported in this study was high compared to those reported from a moderate transmission region in Kolla-Shele Southwest Ethiopia [16], but consistent with findings from Cote d'Ivoire [30]. This is in agreement with previous observations of an increased MOI with increase in endemicity [31]. As reported in Sudan [32], the high rate of MOI in the present study suggests that the scale-up of malaria control interventions may have failed to reduce the level of MOI, and this is in contrast to the malaria control efforts. Additionally, determination of the entomological inoculation rate is important to identify the malaria transmission levels and the extent of MOI. In the

present study, it is difficult to estimate the effect of mosquito inoculums on the multiplicity of infection with *P. falciparum*, due to unavailability of entomological data in the study area. The genetic diversity and MOI reported in the present study confirms a high level of local malaria transmission.

The results of this study show that age has no association on multiplicity of infection, similar to reports from other studies [33]. On the contrary, this finding contrasts with reports from Brazzaville, Republic of Congo [34]. This suggests that the effect of age on the multiplicity of infection is not directly related to the periodic acquisition of immunity. Previous studies have shown a correlation between the MOI and parasite density [20], but in our study the MOI did not increase with higher parasite densities, similar to reports from other studies [35]. The results of this study showed that isolates from younger children had higher parasite densities compared to adult patients. This is in agreement with previous reports from Sudan [23]. These findings suggest that immune status may be a determining factor in the observed variations.

The present study results show high allelic diversity in *P. falciparum* isolates in the study area, however, the *mSP2* gene has immunologic effects under selective pressure [36]. Moreover, this study was performed in a single blood sample may however, not enough to reveal the whole diversity of the parasite population harbored by an individual, and the use of a single marker that may underestimate the magnitude of multiple infections [37, 38]. Further longitudinal studies, using neutral markers such as microsatellites or single nucleotide polymorphisms may be better for evaluation of the parasite populations' dynamics.

## Conclusion

This study of *P. falciparum* isolates from northwest Ethiopia, found isolates to have a high genetic polymorphism and that most infections were from multiple clones. This result underlines the fact that assessment of parasite diversity can play an important role in the evaluation of malaria control interventions. Therefore, further investigation in different transmission settings is required to assess the changes in the genetic parameters and to evaluate malaria control interventions in the country.

## Supporting information

**S1 Fig. Electrophoresis separation of MSP2 genotyping with FC27 allelic types.**  
(DOCX)

**S2 Fig. Electrophoresis separation of MSP2 genotyping with 3D7/IC allelic types.**  
(DOCX)

**S1 Table. Data file document.**  
(XLSX)

## Acknowledgments

We are grateful to the staffs of Pawe Health Center and the study participants. This study was supported by the Federal Ministry of Health, the International Atomic Energy Agency (IAEA) and Ethiopian Public Health Institute (EPHI). We also thank to Dr Robert Commons for reviewing and improving the manuscript.

## Author Contributions

**Data curation:** HM MT.



**Formal analysis:** HM MT.

**Funding acquisition:** AA.

**Investigation:** HM MK AA MT AK.

**Methodology:** HM AA.

**Project administration:** HM AK AA.

**Resources:** AA.

**Software:** MT.

**Supervision:** HM AK AA.

**Validation:** MK.

**Visualization:** MK.

**Writing – original draft:** HM AA MT.

**Writing – review & editing:** HM AK AA.

## References

1. WHO. WorldMalaria Report. Geneva Switzerland. World Health Organization; 2015.
2. Federal Ministry of Health of Ethiopia. HSDP IV Annual Performance Report EFY 2006 (2013/2014). FMOH; Report No.: Version 1; 2014.
3. President's Malaria Initiative Ethiopia. Malaria Operational Plan FY; 2015.
4. Snow RW, Guerra CA, Noor AM, Myint HY, Hay SI. The global distribution of clinical episodes of *Plasmodium falciparum* malaria. *Nature*. 2005; 434:214. <https://doi.org/10.1038/nature03342> PMID: 15759000
5. Arnot D. Unstable malaria in Sudan: The influence of the dry season. Clone multiplicity of *Plasmodium falciparum* infections in individuals exposed to variable levels of disease transmission. *Trans R Soc Trop Med Hyg*. 1998; 92:580–585. [https://doi.org/10.1016/S0035-9203\(98\)90773-8](https://doi.org/10.1016/S0035-9203(98)90773-8) PMID: 10326095
6. Genton B, Betuela I, Felger I, Al-Yaman F, Anders RF, Saul A et al. A recombinant blood-stage malaria vaccine reduces *Plasmodium falciparum* density and exerts selective pressure on parasite populations in a phase 1-2b trial in Papua New Guinea. *J Infect Dis*. 2002; 185:820–82. <https://doi.org/10.1086/339342> PMID: 11920300
7. Chaitarra V, Holm I, Bentley GA, Petres S, Longacre S. The crystal structure of C-terminal merozoite surface protein 1 at 1.8 resolutions, a high protective malaria vaccine candidate. *Mol Cell*. 1999; 3:457–64. PMID: 10230398
8. Lawrence G, Cheng QQ, Reed C, Taylor D, Stowers A, Cloonan N, et al. Effect of vaccination with 3 recombinant asexual-stage malaria antigens on initial growth rates of *Plasmodium falciparum* in non-immune volunteers. *Vaccine*. 2000; 18:1925–1931. PMID: 10699342
9. Hofmann EH, Malafronte RS, Moraes-Avila SL, Osakabe AL, Wunderlich G, Durham AM, et al. Origins of sequence diversity in the malaria vaccine candidate merozoite surface protein-2 (MSP-2) Amazonian of *Plasmodium falciparum*. *Gene* 2006; 376(2):224–230 <https://doi.org/10.1016/j.gene.2006.03.011> PMID: 16716539
10. Ntoumi F, Ngoundou-Landji J, Luty AJ, Dubreuil G, Millet P. Allelic polymorphism of *Plasmodium falciparum* MSP-2 gene in blood samples from Gabonese children. *Bull Soc Pathol Exot*. 2001; 94:183–7.
11. Babiker HA, Abdel-Muhsin AA, Hamad A, Mackinnon MJ, Hill WG, Walliker D. Population dynamics of *Plasmodium falciparum* in an unstable malaria area of eastern Sudan. *Parasitology*. 2000; 120:105–11. PMID: 10726272
12. Kiwanuka GN. Genetic diversity in *Plasmodium falciparum* merozoite surface protein 1 and 2 coding genes and its implications in malaria epidemiology: a review of published studies from 1997–2007. *J Vector Borne Dis*. 2009; 46:1–12. PMID: 19326702
13. Mwingira G, Nkwengulila S, Schoepflin et al. *Plasmodium falciparum* msp1, msp2 and glurp allele frequency and diversity in sub-Saharan Africa. *Malar J*. 2011; 10:79. Epub 2011/04/08. <https://doi.org/10.1186/1475-2875-10-79> PMID: 21470428;

14. Peyerl-Hoffmann G, Jelinek T, Kilian A, Kabagambe G, Metzger WG, vonSonnenburg F. Genetic diversity of *Plasmodium falciparum* and its relationship to parasite density in an area with different malaria endemicities in West Uganda. *Trop Med Int Health*. 2001; 6:607–13. PMID: [11555426](#)
15. Gomez D, Chaparro J, Rubiano C, Rojas MO, Wasserman M. Genetic diversity of *Plasmodium falciparum* field samples from an isolated Colombian village. *Am J Trop Med Hyg*. 2002; 67:611–6.
16. Mohammed H, Mindaye T, Belayneh M, Kassa M, Assefa A, Tadesse M, Woyessa, Mengesha T, Kebede A. Genetic diversity of *Plasmodium falciparum* isolates based on MSP-1 and MSP-2 genes from Kolla-Shele area, Arbaminch Zuria District, southwest Ethiopia. *Malar J*. 2015; 14:73. <https://doi.org/10.1186/s12936-015-0604-8> PMID: [25889847](#)
17. Federal Ministry of Health Ethiopia (FMOH). National Strategic plan 2014–2020 (Draft); 2014.
18. Plowe CV, Djimde A, Bouare M, Doumbo O, Wellems TE. Pyrimethamine and proguanil resistance-conferring mutations in *Plasmodium falciparum* dihydrofolate reductase: polymerase chain reaction methods for surveillance in Africa. *Am J Trop Med Hyg*. 1995; 52(6):565–8. PMID: [7611566](#)
19. Ntoumi F, Ngoundou-Landji J, Lekoulou F, Luty A, Deloron P, Ringwald P. Site-based study on polymorphism of *Plasmodium falciparum* msp-1 and msp-2 genes in isolates from two villages in Central Africa. *Parasitol*. 2000; 42:197–203.
20. Mayengue PI, Ndounga M, Malonga FV, Bitemo M, Ntoumi F. Genetic Polymorphism of merozoite surface protein -1 and merozoite surface protein-2 in *Plasmodium falciparum* isolates from Brazzaville Republic of Congo. *Malar J*. 2011; 10:276. <https://doi.org/10.1186/1475-2875-10-276> PMID: [21936949](#)
21. Nei M. Estimation of average heterozygosity and genetic distance from a small number of individuals. *Genetics*. 1978; 89:583–90. PMID: [17248844](#)
22. Basco LK, Tahar R, Escalante A. Molecular epidemiology of malaria in Cameroon. XVIII. Polymorphisms of the *Plasmodium falciparum* merozoite surface antigen-2 gene in isolates from symptomatic patients. *Am J Med Hyg*. 2004; 70:238–244.
23. Ogouyèmi-Hounto A, Gazard DK, Ndam N, Topanou E, Garba O, Pancras E, et al. Genetic polymorphism of merozoite surface protein-1 and merozoite surface protein-2 in *Plasmodium falciparum* isolates from children in South of Benin. *Parasite*. 2013; 20:37. <https://doi.org/10.1051/parasite/2013039> PMID: [24135216](#)
24. Hamid MM, Mohammed SB, El-Hussan IM. Genetic diversity of *Plasmodium falciparum* field isolates in Central Sudan inferred by PCR genotyping of merozoite surface protein 1 and 2. *N Am J Med Sci*. 2013; 5:95–101. <https://doi.org/10.4103/1947-2714.107524> PMID: [23641369](#)
25. Atroosh WM, Al-Mekhlafi HM, Mahdy MA, Saif-Ali R, Al-Mekhlafi AM, Surin J. Genetic diversity of *Plasmodium falciparum* isolates from Pahang, Malaysia based on MSP-1 and MSP-2 genes. *Parasite Vectors*. 2011; 4:233. <https://doi.org/10.1186/1756-3305-4-233> PMID: [22166488](#);
26. Khaireh BA, Assefa A, Guessod HH, Basco LK, Khaireh MA, Pasqual A, et al. Population genetics analysis during the elimination process of *Plasmodium falciparum* in Djibouti. *Malar J*. 2013; 12:201. *Epub* 2013/06/14. <https://doi.org/10.1186/1475-2875-12-201> PMID: [23758989](#)
27. Anthony TG, Conway DJ, Cox-Singh J, Matusop A, Ratnam S, Shamsul S, et al. Fragmented population structure of *Plasmodium falciparum* in a region of declining endemicity. *J Infect Dis*. 2005; 191:1558–1564. <https://doi.org/10.1086/429338> PMID: [15809916](#).
28. Soulama I, Nebie I, Ouédraogo A, Gansane A, Diarra A, Tiono AB, et al. *Plasmodium falciparum* genotypes diversity in symptomatic malaria of children living in an urban and a rural setting in Burkina Faso. *Malar J*. 2009; 8:135. <https://doi.org/10.1186/1475-2875-8-135> PMID: [19545390](#)
29. Babiker HA, Lines J, Hill WG, Walliker D. Population structure of *Plasmodium falciparum* in villages with different malaria endemicity in east Africa. *Am J Trop Med Hyg*. 1997; 56:141–147. PMID: [9080871](#)
30. Mara SE, Silue KD, Raso G, N'Guetta SM, N'Goran EK, Tanner M et al. Genetic diversity of *Plasmodium falciparum* among school-aged children from the Man region, western Cote d'Ivoire. *Malar J*. 2013; 12:419. <https://doi.org/10.1186/1475-2875-12-419> PMID: [24228865](#)
31. Babiker HA, Ranford-Cartwright LC, Walliker D. Genetic structure and dynamics of *Plasmodium falciparum* infections in the Kilombero region of Tanzania. *Trans R Soc Trop Med Hyg* 1999, 93:11–14. PMID: [10450420](#)
32. Bakhiet AM, Abdel-Muhsin AM, Elzaki SE, Al-Hashami Z, Albarwani HS, Al-Qamashoui BA, et al. *Plasmodium falciparum* population structure in Sudan post artemisinin-based combination therapy. *Acta Trop*. 2015; 148: 97–104. <https://doi.org/10.1016/j.actatropica.2015.04.013> PMID: [25913735](#)
33. Dolmazon V, Matsika-Claquin MD, Manirakiza A, Yapou F, Nambot M, Menard D. Genetic diversity and genotype multiplicity of *Plasmodium falciparum* infections in symptomatic individuals living in Bangui (CAR) *Acta Trop*. 2008; 107:37–42. <https://doi.org/10.1016/j.actatropica.2008.04.012> PMID: [18501320](#)

34. Pembe IM, Ndounga M, Malonga FV, Bitemo M, Ntoumi F: Genetic polymorphisms of merozoite surface protein-1 and surface protein-2 in *Plasmodium falciparum* isolates from Brazzaville, Republic of Congo. *Malar J.* 2011; 10:276. <https://doi.org/10.1186/1475-2875-10-276> PMID: 21936949
35. Ojurongbe O, Fagbenro-Beyioku AF, Adeyeba OA, Kun JF. Allelic Diversity of Merozoite Surface Protein 2 Gene of *P.falciparum* among Children in Osogbo, Nigeria. *West Indian Med J.* 2011; 60(1):19–23. PMID: 21809706
36. Smith T, Felger I, Kitua A, Tanner M, Beck HP. Dynamics of multiple *P. falciparum* infections in infants in a highly endemic area of Tanzania. *Trans R Soc Trop Med Hyg.* 1999; 93(supply 1): 35–9.
37. Babiker HA, Ranford-Cartwigh LC, Walliker D. Genetic structure and dynamics of *Plasmodium falciparum* infections in the Kilombero region of Tanzania. *Trans R Soc Trop Med Hyg.* 1999; 93 (Supply 1):11–4.
38. Farnert A, Lebbad M, Faraja L, Rooth I. Extensive dynamics of *Plasmodium falciparum* densities, stages and genotyping profiles. *Malar J.* 2008; 7:241. <https://doi.org/10.1186/1475-2875-7-241> PMID: 19025582
